# Supplementary material for: The Kunitz-Like Modulatory Protein Haemangin Is Vital for Hard Tick Blood-Feeding Success
Source: PLOS journal article supplement (doi:10.1371/journal.ppat.1000497), 2009-07-09

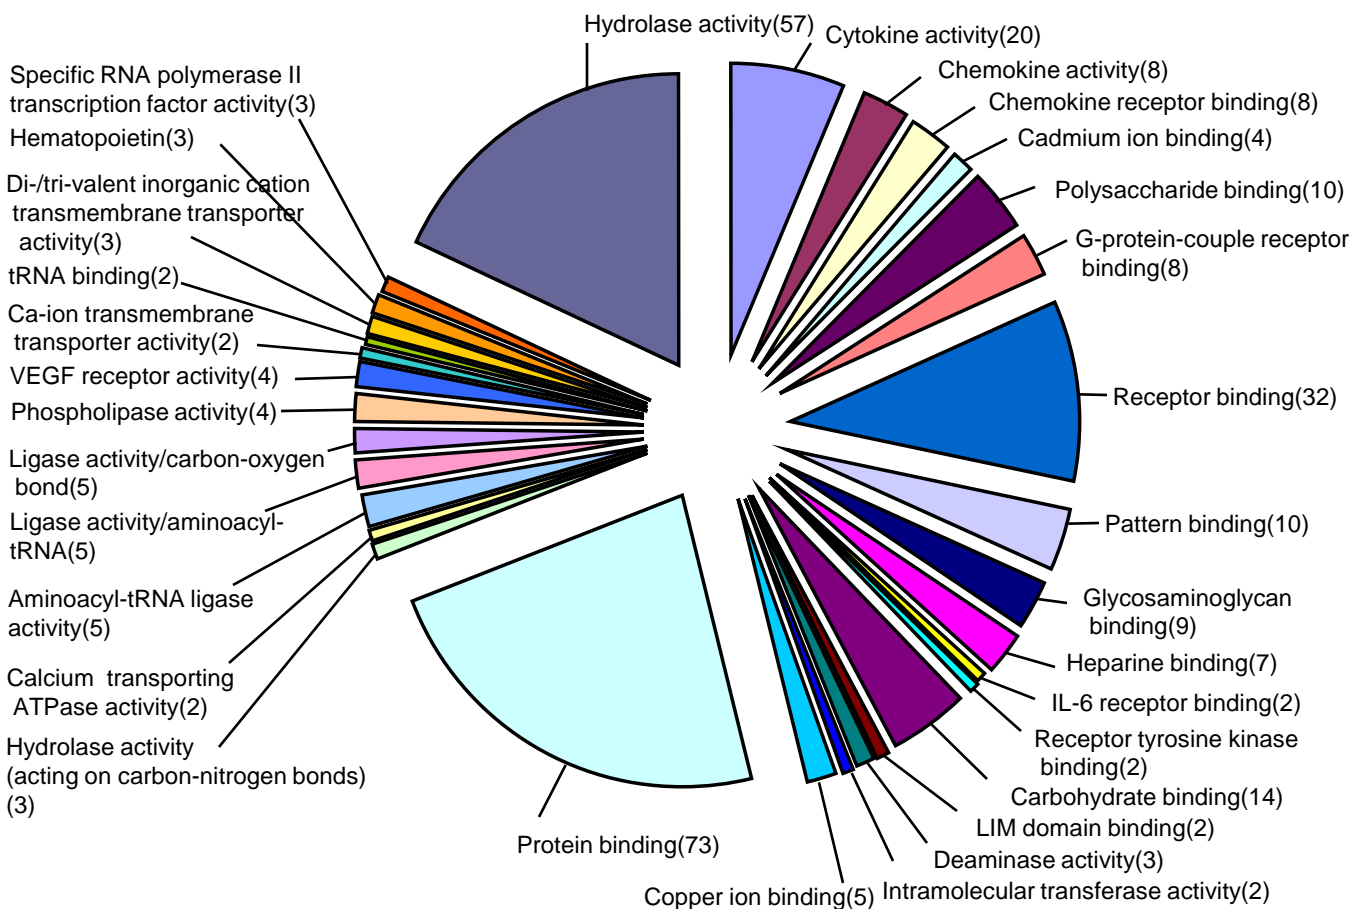

Supplement: S1 (10.1371/journal.ppat.1000497.s001) [file journal.ppat.1000497.s001]
